# Supplementary material for: Dual Role for the O-Acetyltransferase OatA in Peptidoglycan Modification and Control of Cell Septation in Lactobacillus plantarum
Source: PubMed Central journal article supplement (PMC3482227; doi:10.1371/journal.pone.0047893), 2012-10-26

Figure S3.

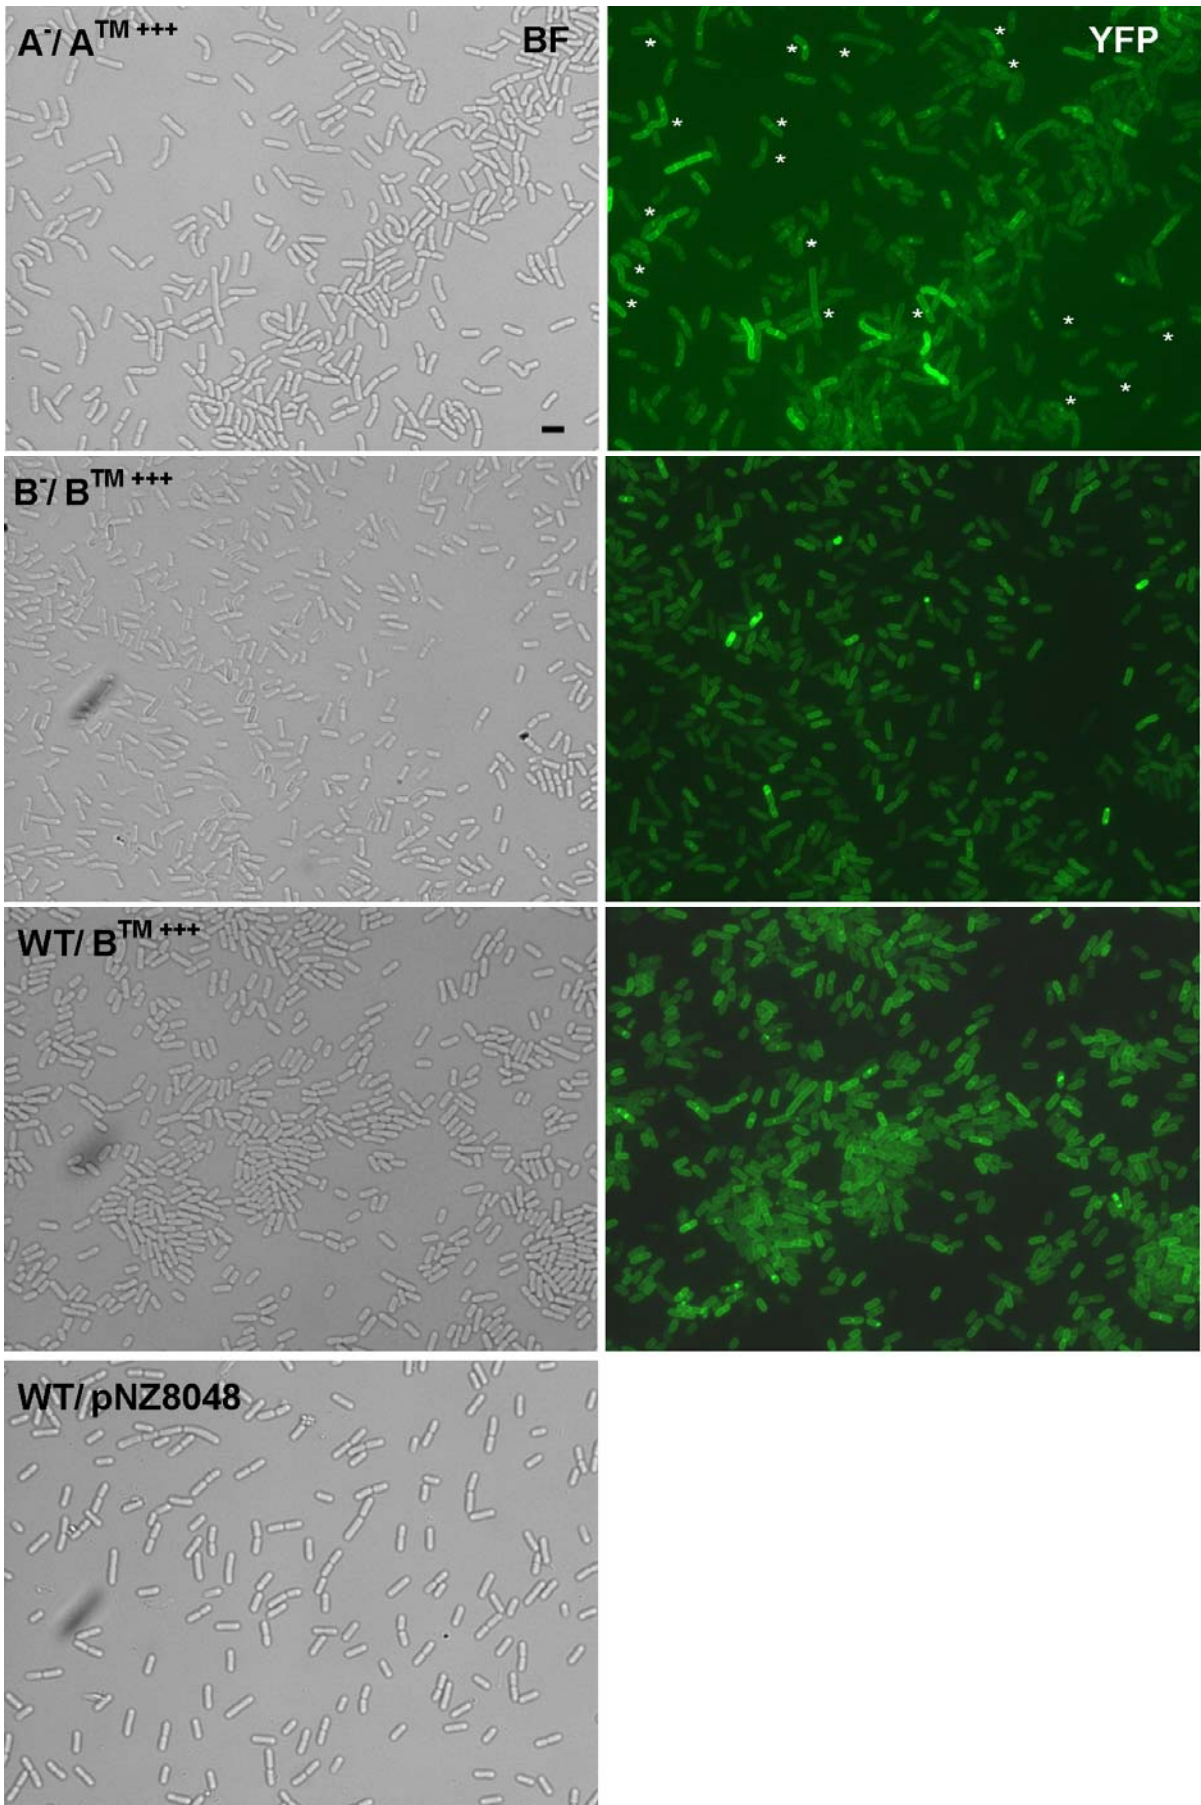

Supplement: pone.0047893.s003.pdf [file pone.0047893.s003.pdf]
