# Supplementary material for: Dual Role for the O-Acetyltransferase OatA in Peptidoglycan Modification and Control of Cell Septation in Lactobacillus plantarum
Source: PubMed Central journal article supplement (PMC3482227; doi:10.1371/journal.pone.0047893), 2012-10-26
Supplement: pone.0047893.s006.pdf [file pone.0047893.s006.pdf]

**Table S1.** Primers used for cloning and validation

| Primer name                                                         | Sequence <sup>a</sup>                                                                                | Mutant strain or plasmid      |
|---------------------------------------------------------------------|------------------------------------------------------------------------------------------------------|-------------------------------|
| <b>Primers used for the construction of the YFP reporter vector</b> |                                                                                                      |                               |
| NcoIVenus4X4                                                        | 5'-A <u>ACCATGG</u> ACGTCTCTAGACCTGCAGGCGCATGCGTGAGCAAGG<br>GCGAGGAGCTGTTACCGGGGT-G 3'               | pGIBD008                      |
| SacIVenus4X4                                                        | 5' -AAAG <u>AGCTCT</u> TAGGATCCGGAAGTAGTAACGCCCGGGCACATG<br>TGGCGCGCAGCACGCGTCTTGTACAGCTCGTCCATGC-3' |                               |
| <b>Primers used for the construction of YFP fusions</b>             |                                                                                                      |                               |
| 5'OatAPstI                                                          | 5'-ATA <u>CTGCAGG</u> AAAAATTTGCGGAGCG-3'                                                            | pGIEB018                      |
| 3'TMLoatAXbaI                                                       | 5'-TCGAT <u>CTAGACA</u> ATAACCGACTGTAAT-3'                                                           |                               |
| 5'OatBPstI                                                          | 5'-GTC <u>CTGCAGC</u> CAAAAAAATTAGGGGGACGGTAAGTTAG-3'                                                | pGIEB019                      |
| 3'TMLoatBXbaI                                                       | 5'-TCGAT <u>CTAGAG</u> CCCCGAATCACTGGTTC-3'                                                          |                               |
| 5'minC_NcoI                                                         | 5'-ATG <u>CCATGGA</u> ACAGAGTGTAGTTTTAAAG-3'                                                         | pGIEB020                      |
| 3'minC_XbaI                                                         | 5'-TCGAT <u>CTAGAA</u> ACACGTCCTCCATTTCG-3'                                                          |                               |
| 5'minD_NcoI                                                         | 5'-ATG <u>CCATGGG</u> AAAAGCAATTGTCATCAC-3'                                                          | pGIEB021                      |
| 3'minD_XbaI                                                         | 5'-TCGAT <u>CTAGACT</u> TGCCACGATGAAAAATTC-3'                                                        |                               |
| <b>Primers used for the validation of the constructed vectors</b>   |                                                                                                      |                               |
| pNisA1                                                              | 5'-TACTGACAATAGAAACATTAAC-3'                                                                         | pNZ8048<br>and<br>derivatives |
| pNisA2                                                              | 5'-TATCAATCAAAGCAACAC-3'                                                                             |                               |

<sup>a</sup> Restriction sites introduced in the primers are underlined
